# Supplementary material
Source: PubMed Central journal article supplement (PMC3482467)

Supplemental Figure 1. Comparison of Experimental (dark blue) NOEs with predicted NOEs from 100 nsec MD simulations in explicit solvent.

Suppl. Fig. 1a = data for Lys-9 hairpin model.

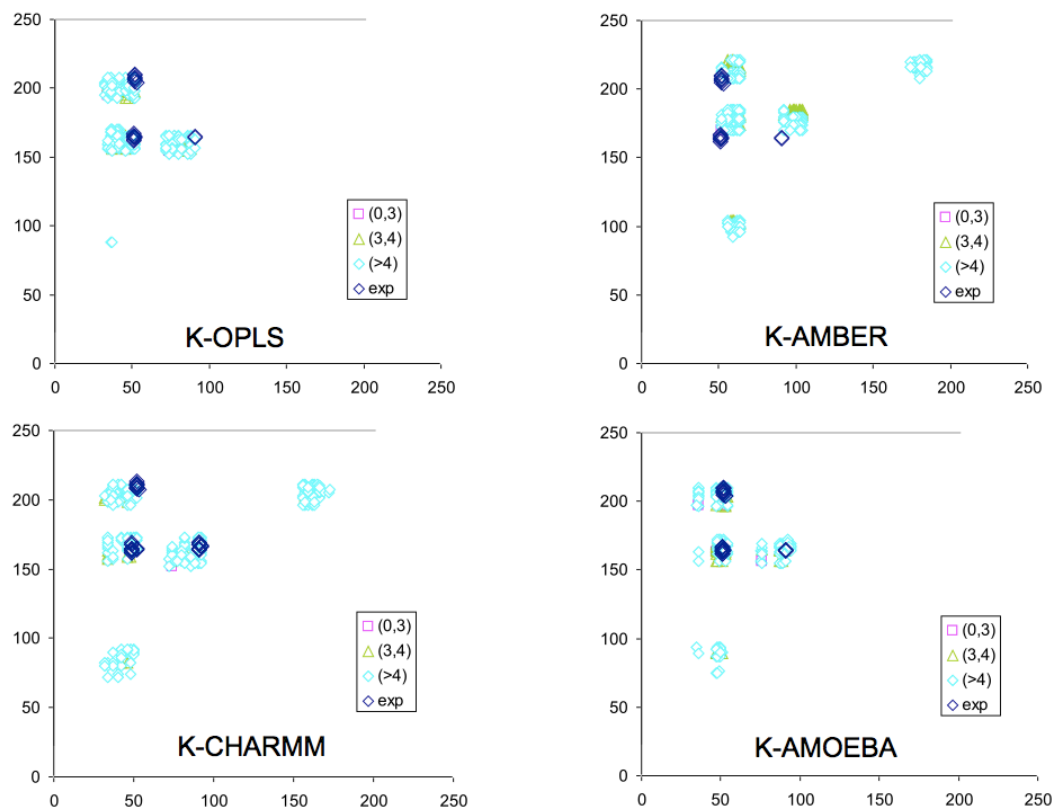

Supplemental Figure 1b. Data for Lys(Me)-9 hairpin model.

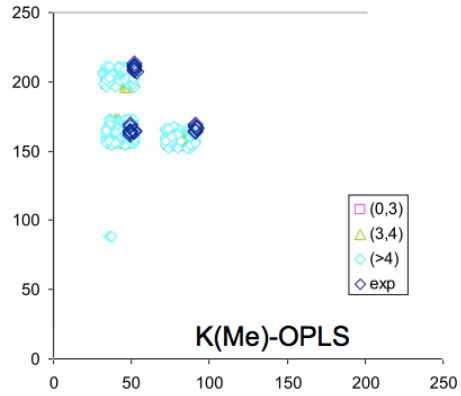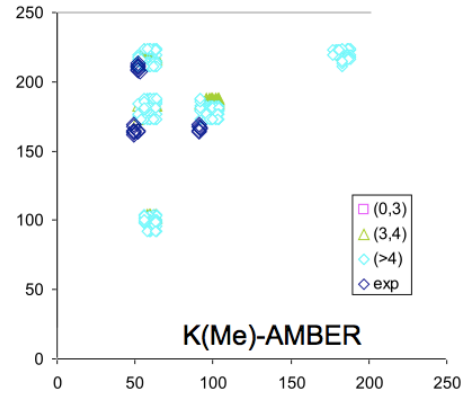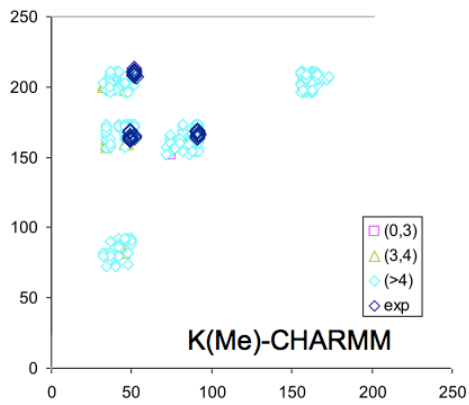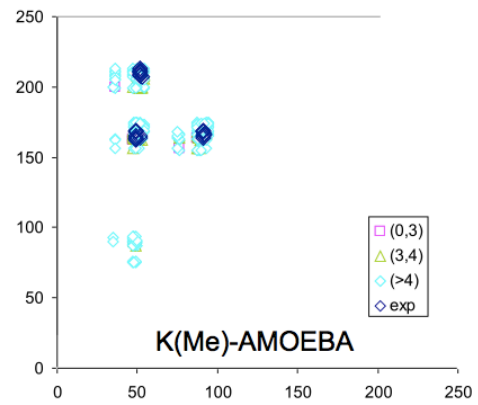

Supplemental Figure 1c. Data for Lys(Me2)-9 hairpin model.

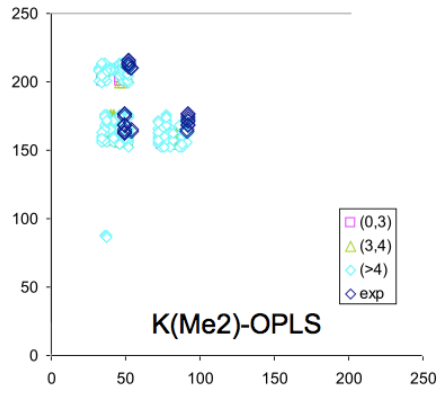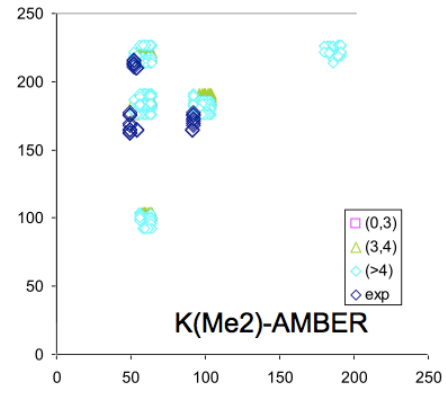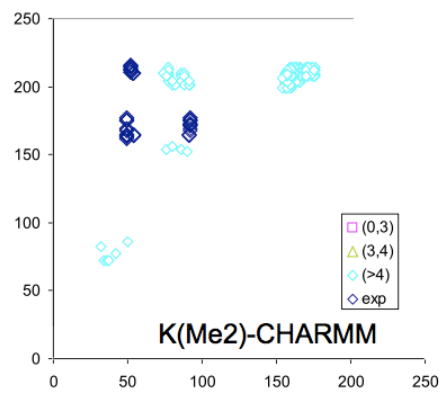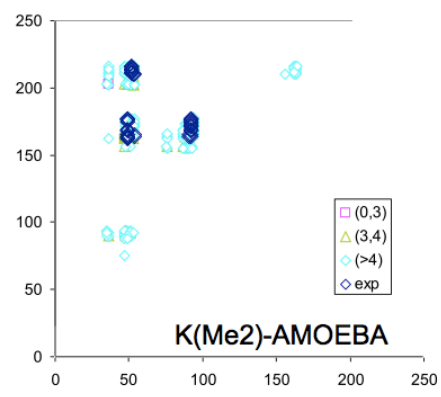

Supplemental Figure 1d. Data for Lys(Me3)-9 hairpin model.

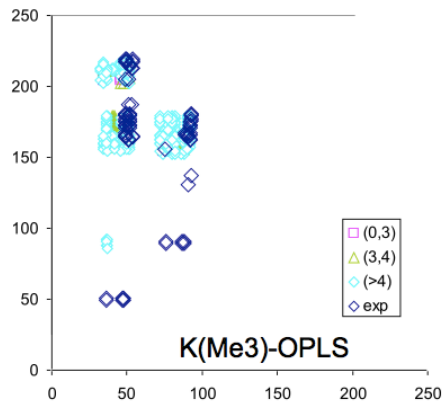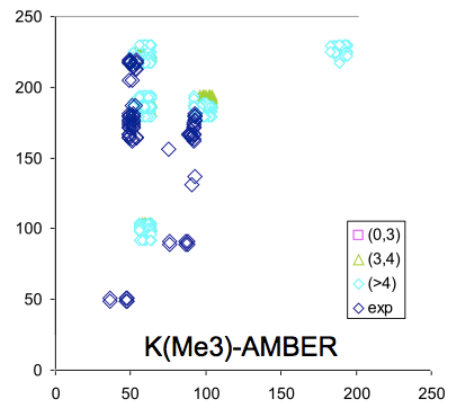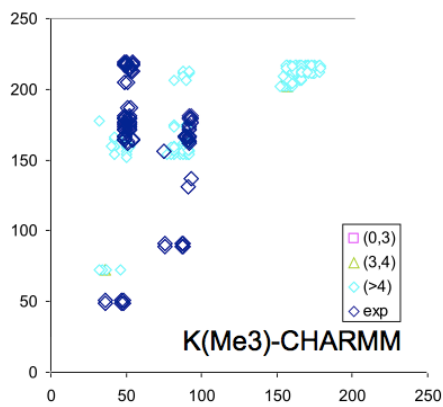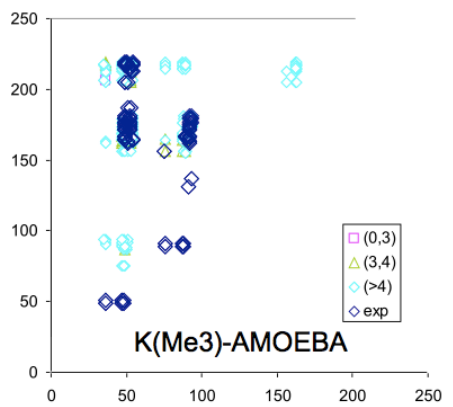

Supplement: NIHMS408706-supplement-1_si_001.pdf [file NIHMS408706-supplement-1_si_001.pdf]
